# Supplementary material
Source: PubMed Central journal article supplement (PMC3399574)
Supplement: cn300034t_si_001.pdf [file cn300034t_si_001.pdf]

## *Supplementary Information for*

# **Oxidative Stress Effect of Dopamine on $\alpha$ -Synuclein: Electroanalysis of solvent interactions**

Tiffany Chan,<sup>a</sup> Ari M. Chow,<sup>b</sup> Xin R. Cheng,<sup>a</sup> Derek W. F. Tang,<sup>b</sup> Ian R. Brown,<sup>b</sup> Kagan Kerman<sup>a,b,\*</sup>

<sup>a</sup> Department of Physical and Environmental Sciences,

<sup>b</sup> Centre for the Neurobiology of Stress, Department of Biological Sciences,

University of Toronto Scarborough, 1265 Military Trail, Toronto, ON, M1C 1A4, Canada

Corresponding author: [\\*kagan.kerman@utoronto.ca](mailto:kagan.kerman@utoronto.ca)

Tel: +1-416-287-7249

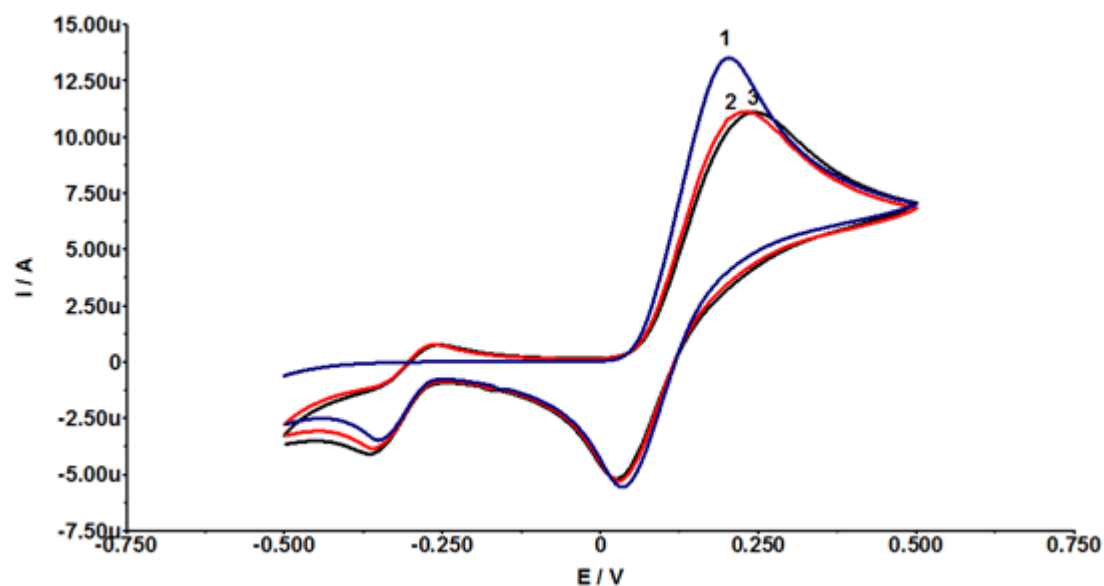

**Supplementary Figure 1.** Cyclic voltammograms of 1 mM dopamine (DA). 1 (blue), 2 (red), and 3 (black) represent the number of consecutive scans at a carbon paste electrode with a scan rate of 50 mVs<sup>-1</sup>, Initial scan: -0.50 V, Final scan: 0.50 V.

**A**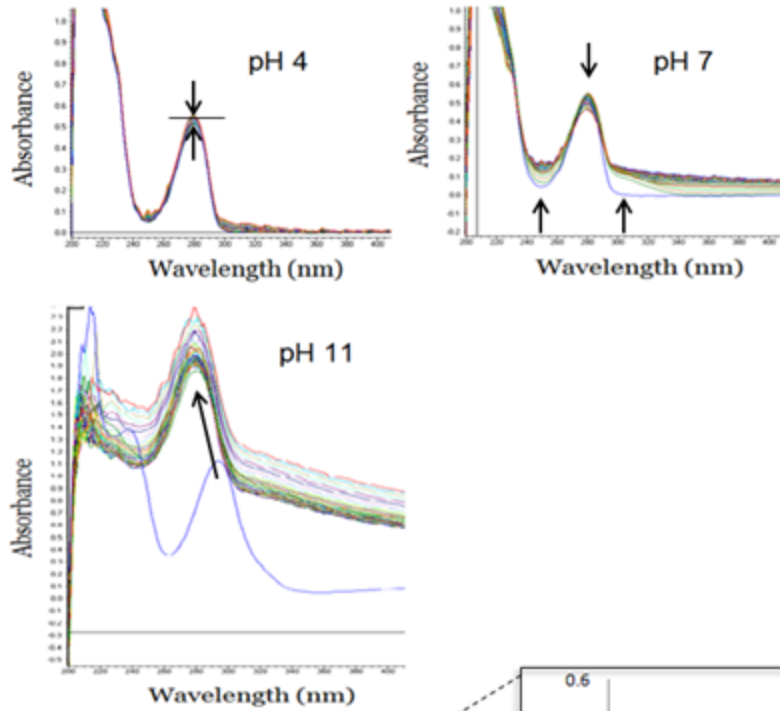**B**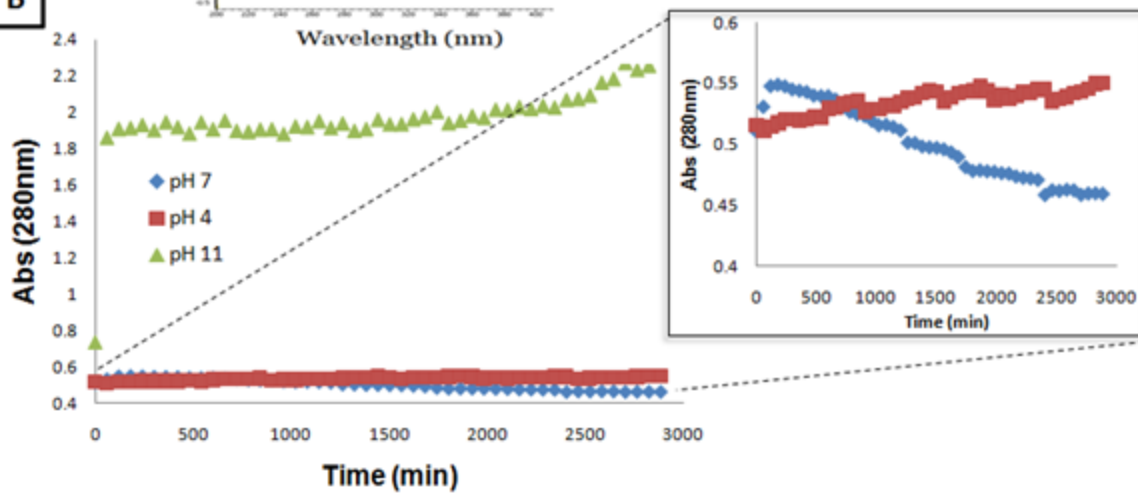

**Supplementary Figure 2.** UV-vis study for the pH dependence of DA oxidation with 200  $\mu$ M DA in 5 mM sodium acetate/5 mM sodium phosphate at different pH values. A) Absorbance spectra were obtained every 1 h for 24 h (arrows indicate change in absorbance, B) Plot for the absorbance value at 280 nm vs. time (pH 7-blue, pH 4-red, pH 11-green).

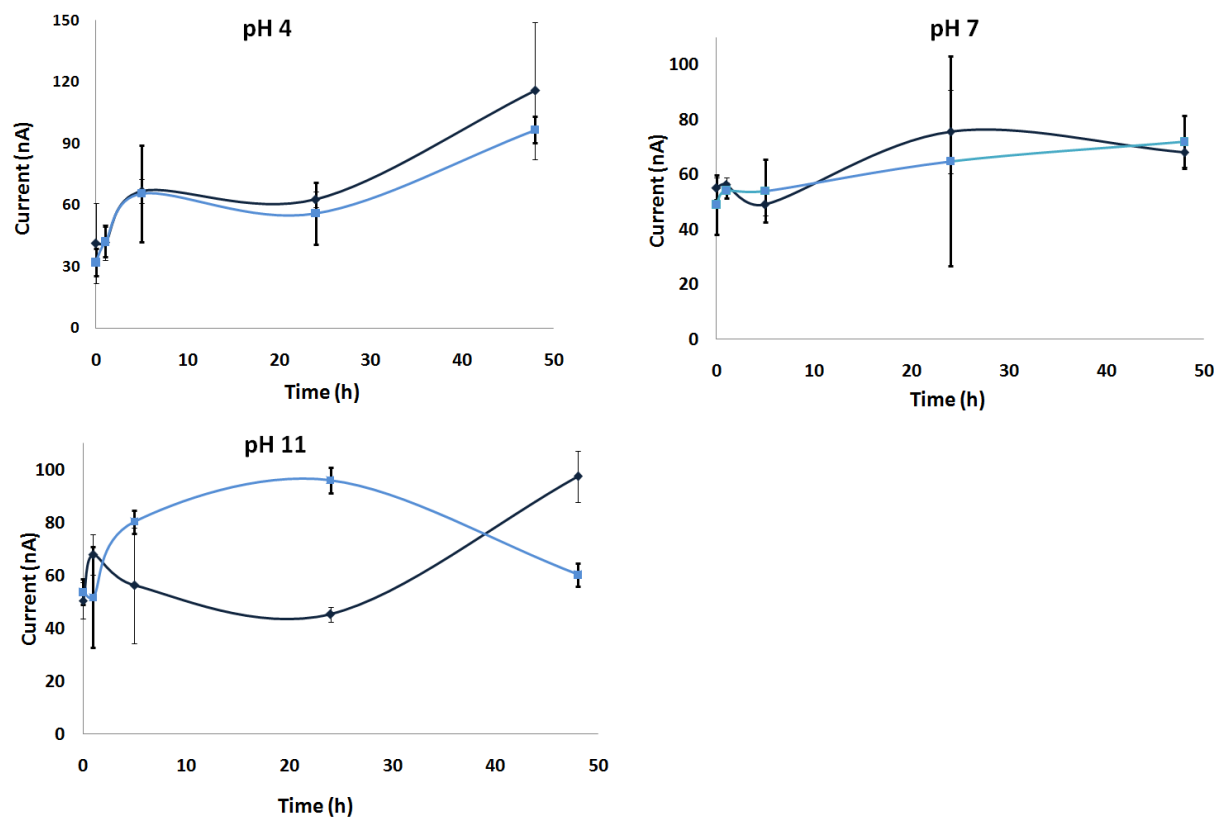

**Supplementary Figure 3.** Electrochemical study for the pH dependence of DA oxidation in the presence of 1  $\mu\text{M}$   $\alpha$ -synuclein (AS). AS was incubated with and without 5  $\mu\text{M}$  DA at pH 4, 7 and 11 in 5 mM sodium acetate/5 mM sodium phosphate buffer at  $37 \pm 1^\circ\text{C}$  with shaking for 48 h. (Dark blue line – absence of DA, Light blue line – presence of 5  $\mu\text{M}$  DA).
